# Supplementary material for: A novel aptasensor based on MUC-1 conjugated CNSs for ultrasensitive detection of tumor cells
Source: Royal Society of Chemistry journal article supplement (doi:10.1039/c4an00844h), 2014-07-08
Supplement: c4an00844h1.pdf [file c4an00844h1.pdf]

**Supporting Information for**  
**A novel aptasensor based on MUC-1 conjugated CNSs for**  
**ultrasensitive detection of tumor cells**

**Hongmei Cao, Daixin Ye, Qianqian Zhao, Juan Luo, Song Zhang, Jilie Kong\***

Department of Chemistry and Institutes of Biomedical Sciences, Fudan University, Shanghai

200433, PR China

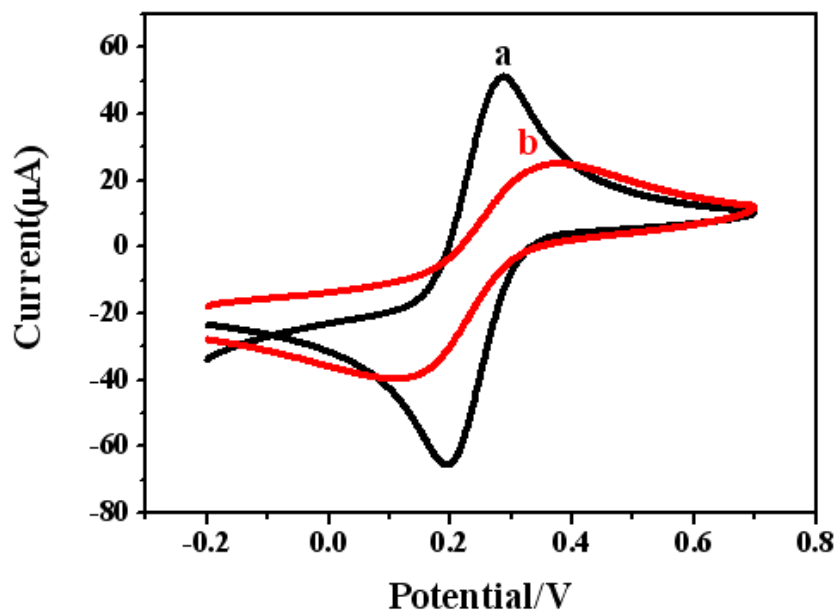

**Fig. S1** Cyclic voltammetric response of GCE (a) and Aptamer/CNSs-COOH/GCE (b) in  $[\text{Fe}(\text{CN})_6]^{3-/4-}$  (10 mM, 1:1) containing 1.0 M KCl solution.

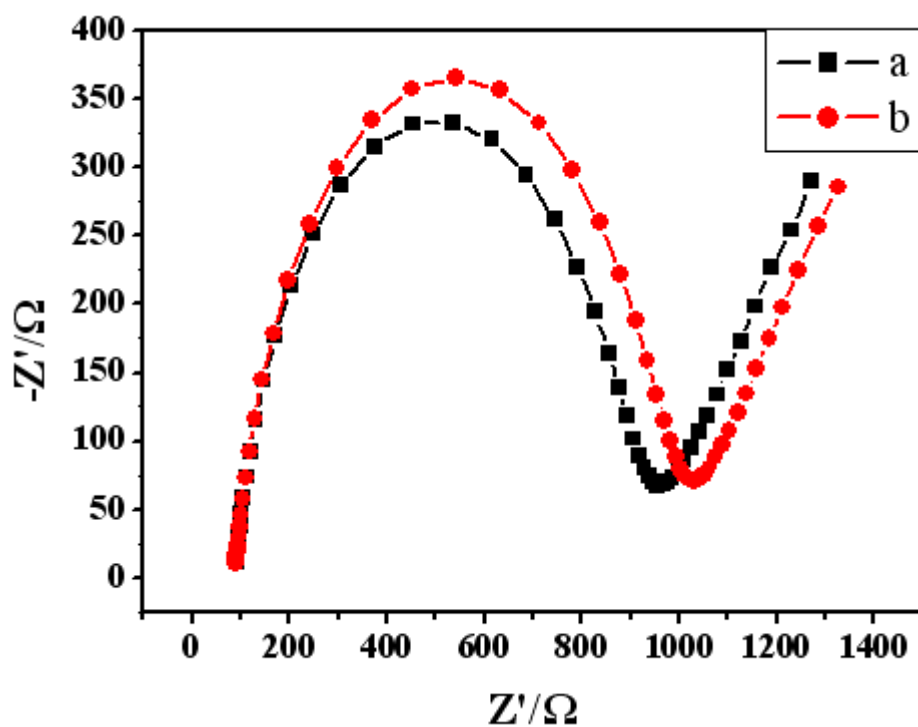

**Fig. S2** Nyquist diagrams of electrochemical impedance spectra recorded from 0.1- $10^5$  Hz for  $[\text{Fe}(\text{CN})_6]^{3-/4-}$  (10 mM, 1:1) in 1.0 M KCl at Aptamer /CNSs-COOH fabricated aptasensor before (b) and after 15 days (a).

**Table S1. The electron-transfer resistance and other fitting parameters for different modified electrodes measured by EIS and calculated by simplified Randles electrical circuit.**

| <b>Electrode</b>        | <b><math>R_s</math> (<math>\Omega</math>)</b> | <b><math>R_{et}</math> (<math>\Omega</math>)</b> | <b>C (nF)</b> |
|-------------------------|-----------------------------------------------|--------------------------------------------------|---------------|
| GCE                     | 90.6±0.5                                      | 142±1                                            | 768.3±1.0     |
| CNSs-COOH/GCE           | 92.9±0.4                                      | 683.0±10.7                                       | 932.5±2.1     |
| Apt/CNSs-COOH/GCE       | 97.9±1.3                                      | 891.0±15.2                                       | 710±3.6       |
| DLD-1/Apt/CNSs-COOH/GCE | 116±1.9                                       | 1682±18.2                                        | 720±6.4       |

**Table S2. Experiment parameters of EIS**

|                                             | <b>Fig.3 (Fabrication process)</b> | <b>Fig. 5 (detection process)</b> |
|---------------------------------------------|------------------------------------|-----------------------------------|
| <b>Frequency scan</b>                       | 0.1-100000 Hz                      | 0.1-100000 Hz                     |
| <b>Amplitude</b>                            | 0.005 V                            | 0.005 V                           |
| <b>Set potential</b>                        | 0.251 V                            | 0.251 V                           |
| <b>Open circuit potential determination</b> | 0.251 V                            | 0.251 V                           |

.

**Table S3. MTT data with exposing to various concentrations of CNSs-COOH for 24h**

| C(mg/ml)<br>Abs Value | 0.25  | 0.5   | 1.0   | 1.25  | 对照(0) | 空白    |
|-----------------------|-------|-------|-------|-------|-------|-------|
| 1                     | 1.518 | 1.457 | 1.436 | 1.335 | 1.667 | 0.319 |
| 2                     | 1.505 | 1.413 | 1.452 | 1.356 | 1.572 | 0.309 |
| 3                     | 1.494 | 1.471 | 1.442 | 1.262 | 1.553 | 0.302 |
| 4                     | 1.498 | 1.468 | 1.431 | 1.477 | 1.529 | 0.306 |
| 5                     | 1.502 | 1.406 | 1.426 | 1.363 | 1.535 | 0.311 |
| 6                     | 1.507 | 1.482 | 1.438 | 1.225 | 1.523 | 0.305 |

**Table S4. MTT result with various concentrations of CNSs-COOH for 48 h.**

| C(mg/ml)<br>Abs Value | 0.25  | 0.5   | 1.0   | 1.25  | 对照(0) | 空白    |
|-----------------------|-------|-------|-------|-------|-------|-------|
| 1                     | 1.494 | 1.463 | 1.406 | 1.345 | 1.605 | 0.326 |
| 2                     | 1.513 | 1.354 | 1.415 | 1.409 | 1.584 | 0.309 |
| 3                     | 1.482 | 1.483 | 1.435 | 1.267 | 1.515 | 0.303 |
| 4                     | 1.468 | 1.410 | 1.371 | 1.356 | 1.535 | 0.302 |
| 5                     | 1.504 | 1.403 | 1.386 | 1.404 | 1.567 | 0.301 |
| 6                     | 1.517 | 1.501 | 1.378 | 1.125 | 1.578 | 0.314 |
